# Supplementary material for: What do community-dwelling Caucasian and South Asian 60–70 year olds think about exercise for fall prevention?
Source: PubMed Central journal article supplement — Age Ageing. 2008 Nov 27;38(1):68–73. doi: 10.1093/ageing/afn237 (PMC2638716; doi:10.1093/ageing/afn237), 2008-11-27
Supplement: afn237_1.pdf [file afn237_1.pdf]

## Appendix 1: Supplementary references

3. Province M.A., Hadley E.C., Horbrook M.C., Lipsitz L.A., Miller J.P., Mulrow C.D. et al The effects of exercise on falls in elderly patients: A pre-planned meta-analysis of the FICSIT trials. *Journal of the American Medical Association* 1995; 273: 1341-1347.
4. Wolf S.L., Barnhart H.X., Kutner N.G., McNeeley E., Coogler C. & Xu T. Reducing frailty and falls in older persons: an investigation of Tai Chi and computerized balance training. *Journal of the American Geriatrics Society* 1996; 44: 489-97.
5. Buchner D.M., Cress M.E., de Lateur B.J., Esselman P.C., Margherita A.J., Price R. & Wagner E.H. The effect of strength and endurance training on gait, balance, fall risk and health services use in community-living older adults. *Journals of Gerontology. Series A, Biological Sciences and Medical Sciences* 1997; 52 (4): M218-24.
9. MacRae P.G., Feltner M.E. & Reinsch S.A. 1-year exercise program for older women: effects on falls, injuries and physical performance. *Journal of Aging and Physical Activity* 1994; 2: 127-142.
13. Dhawan J. & Bray C.L. Asian Indians, coronary artery disease and physical activity. *Heart* 1997; 78 (66): 550-554.
24. Rose G. *The strategy of preventive medicine*. Oxford: Oxford University Press 1992.
